# Supplementary figures and images for: Machine learning for total organic carbon analysis of environmental water samples using high-throughput colorimetric sensors
Source: Royal Society of Chemistry journal article supplement (doi:10.1039/c9an02267h), 2020-01-01

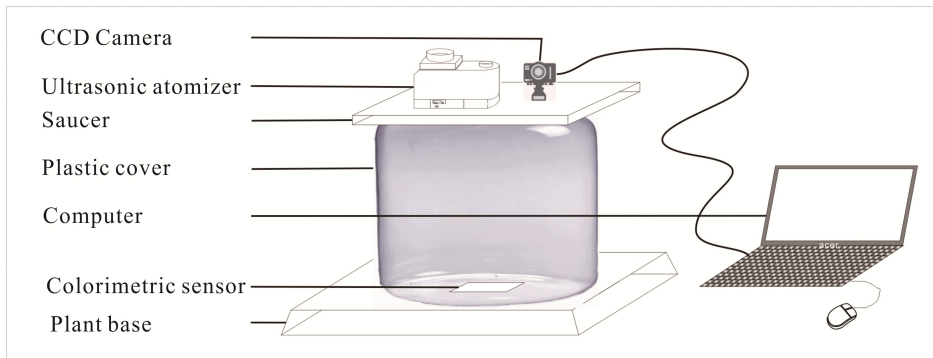

Supplement: c9an02267h3.pdf [file c9an02267h3.pdf]

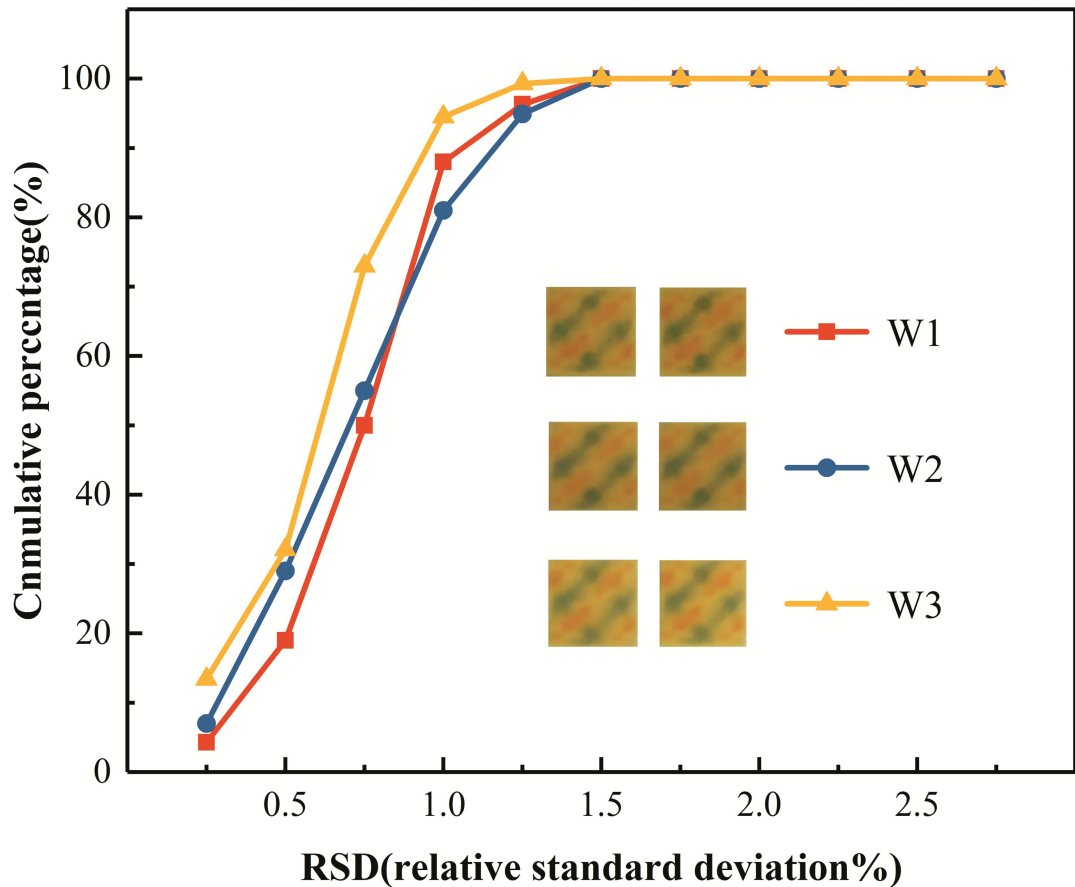

Supplement: c9an02267h6.pdf [file c9an02267h6.pdf]

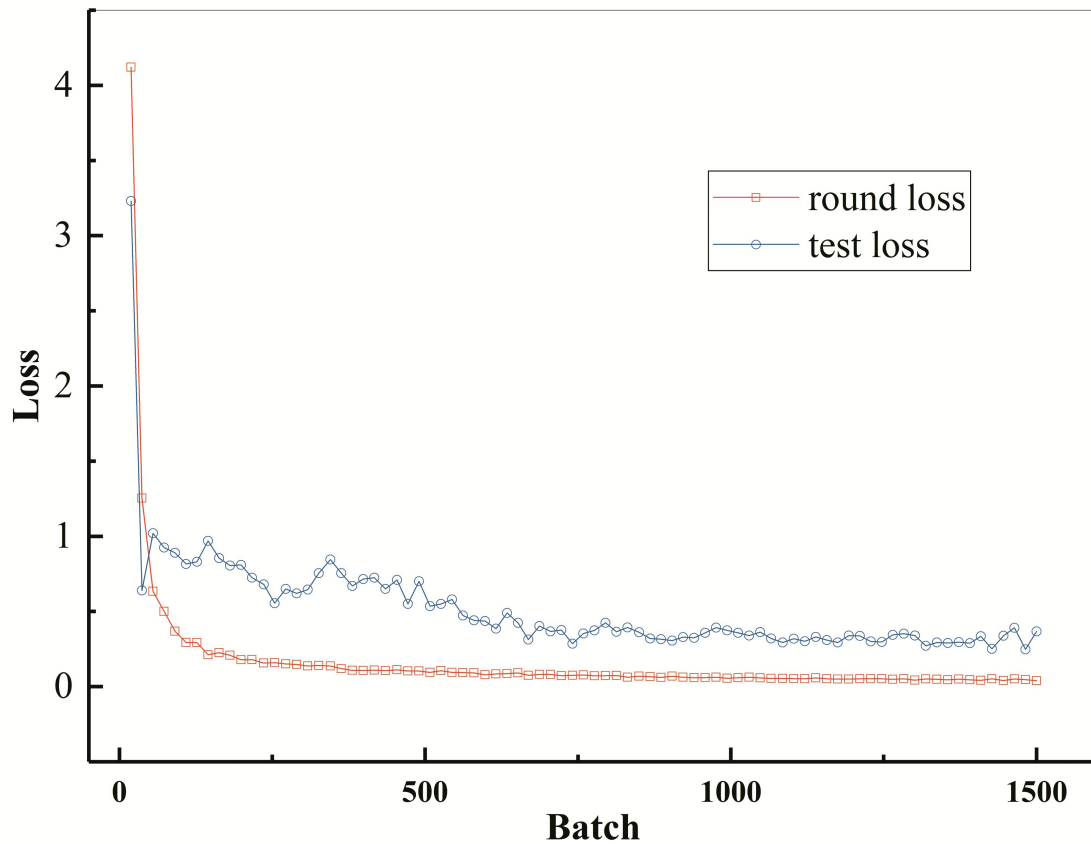

Supplement: c9an02267h7.pdf [file c9an02267h7.pdf]
